# Supplementary material
Source: PubMed Central journal article supplement (PMC5641904)
Supplement: EMBJ-36-3046-s002.pdf [file EMBJ-36-3046-s002.pdf]

## Expanded View Figures

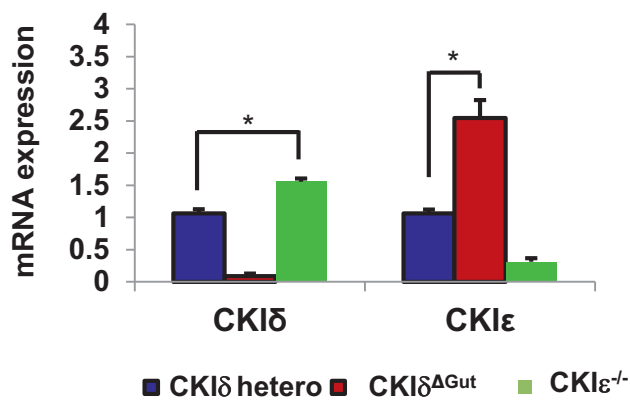**Figure EV1. Functional redundancy between CKI $\delta$  and CKI $\epsilon$  in the gut.**

qRT-PCR analysis of CKI $\delta$  and CKI $\epsilon$  in IECs isolated from CKI $\delta^{+/fl\ ER}$  (CKI $\delta$  hetero,  $n = 3$ ), CKI $\delta^{\Delta\text{Gut}}$  ( $n = 3$ ), and CKI $\epsilon^{-/-}$  mice ( $n = 3$ , mean  $\pm$  SEM); t-test was performed,  $*P < 0.05$ .

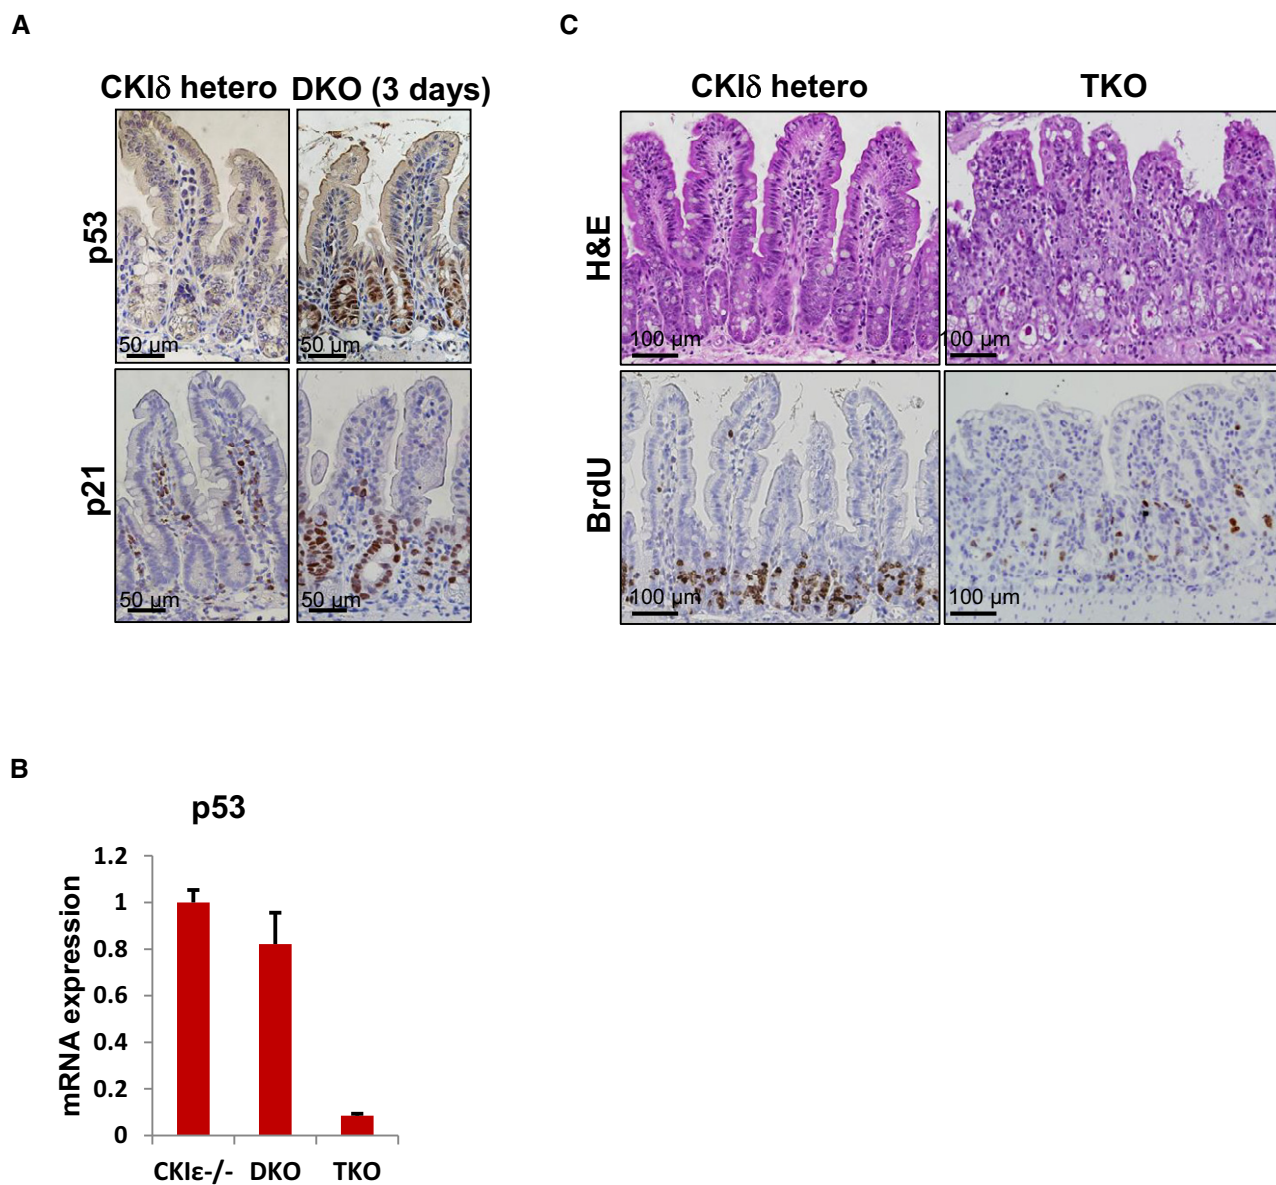

**Figure EV2. CKI $\delta/\epsilon$  ablation triggers a p53-independent cell cycle arrest.**

A IHC analysis of p53 and p21 in intestinal sections from CKI $\delta$  hetero and DKO mice, 3 days after KO induction. Scale bar, 50  $\mu$ m.

B qRT-PCR analysis of p53 levels after KO induction in CKI $\epsilon^{-/-}$ , DKO, and CKI $\delta$ /CKI $\epsilon$ /p53 triple KO mice (TKO) ( $n = 3$ , mean  $\pm$  SEM).

C H&E and IHC of BrdU in intestinal sections from CKI $\delta$  hetero and CKI $\delta$ /CKI $\epsilon$ /p53 triple KO mice (TKO), 5 days after KO induction. Scale bar, 100  $\mu$ m.

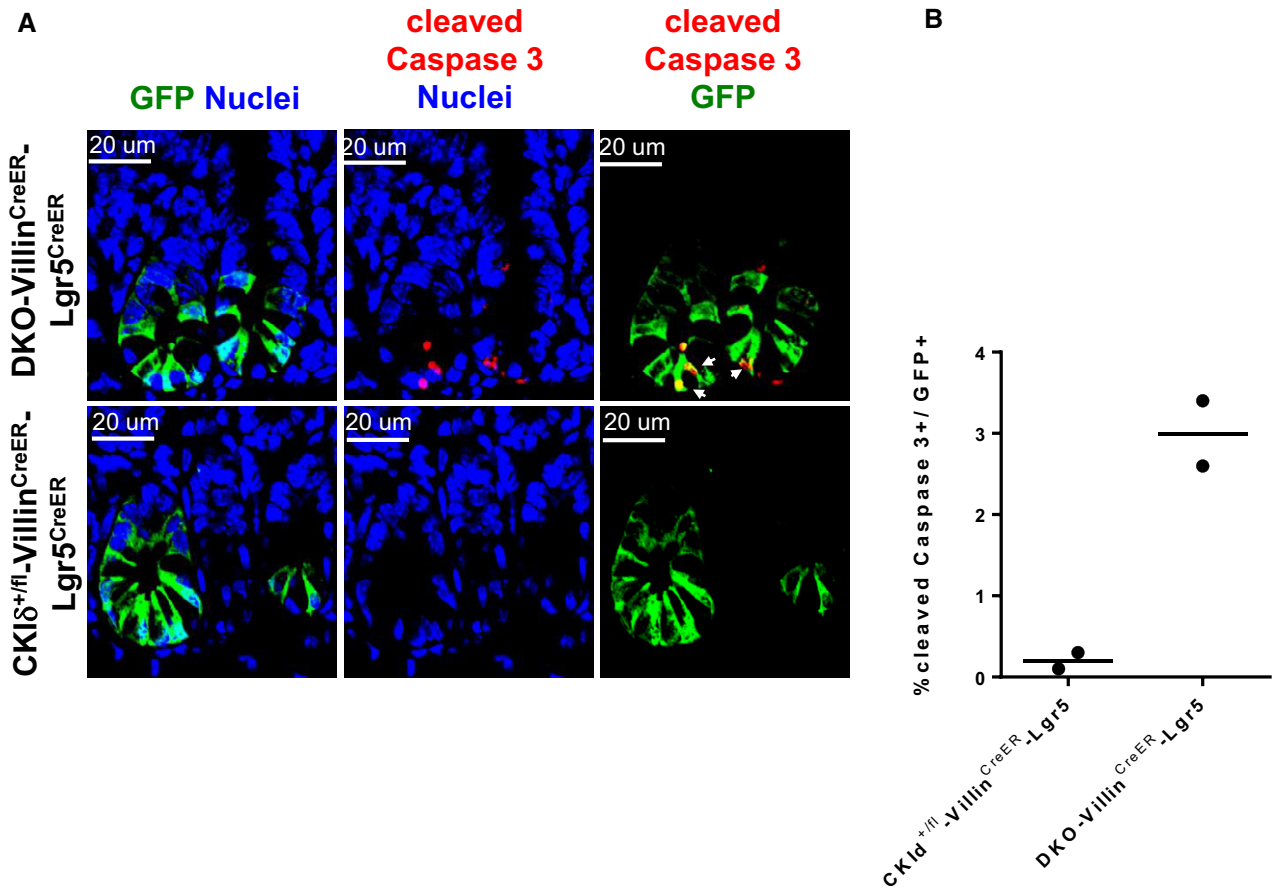

**Figure EV3. CKIδ/ε depletion induces ISC apoptosis.**

A IF analysis of GFP (green) and cleaved Caspase 3 (red) in intestinal sections of CKIδ<sup>+/fl</sup>-Villin<sup>CreER</sup>-Lgr5<sup>CreER</sup> and DKO-Villin<sup>CreER</sup>-Lgr5<sup>CreER</sup> mice 3 days after KO induction; nuclear counterstain Hoechst. Scale bar, 20 μm. Arrows point to cells doubly stained by GFP and cleaved Caspase 3 representing apoptotic Lgr5-GFP cells.

B Quantification of cleaved Caspase 3 IF staining, based on %cleaved Caspase 3<sup>+</sup> cells out of 300 GFP<sup>+</sup> cells in CKIδ<sup>+/fl</sup>-Villin<sup>CreER</sup>-Lgr5<sup>CreER</sup> (*n* = 2) and DKO-Villin<sup>CreER</sup>-Lgr5<sup>CreER</sup> mice (*n* = 2).

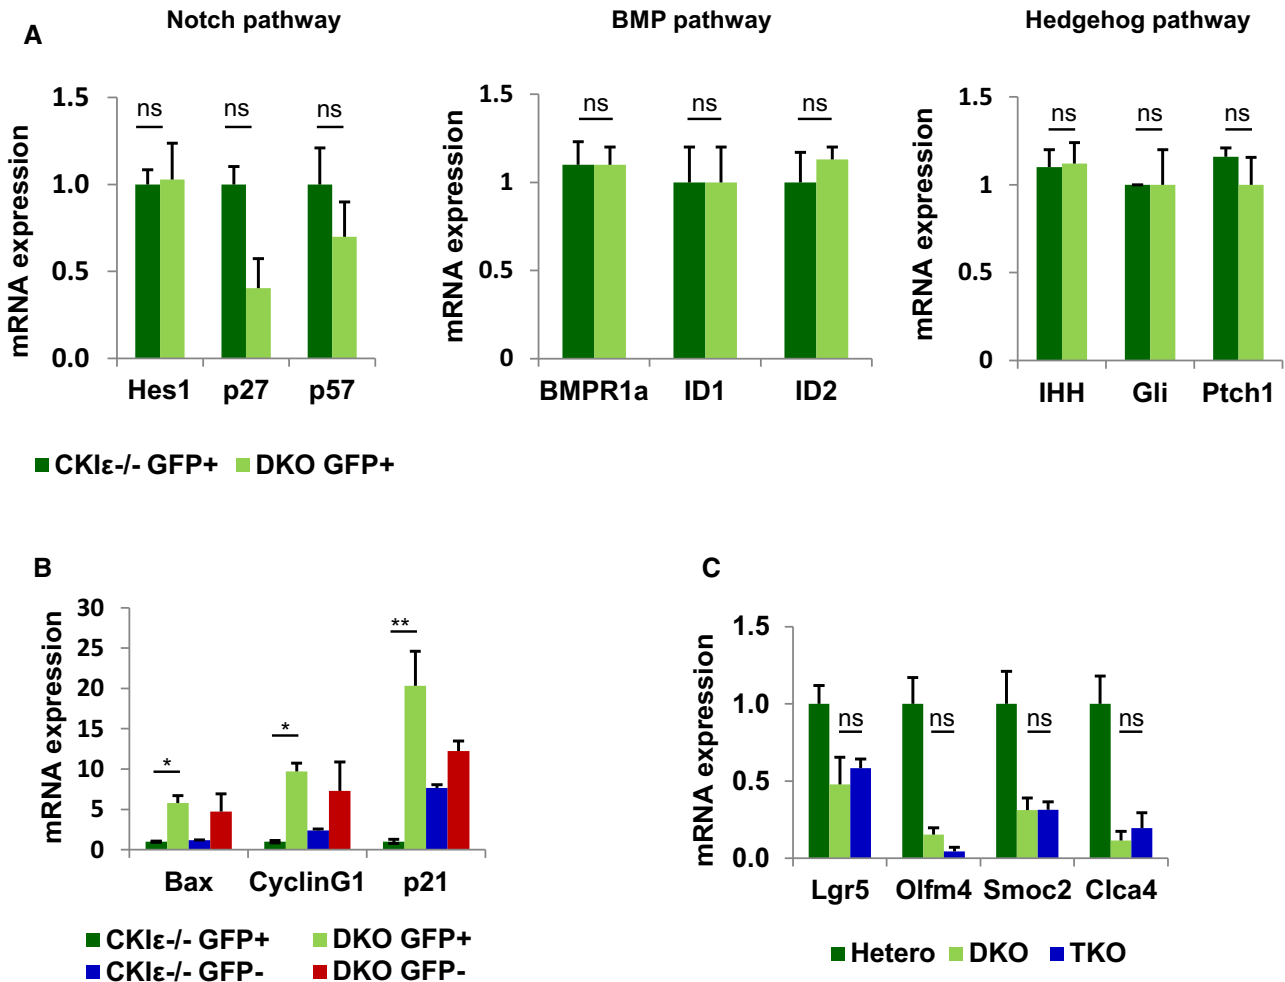

**Figure EV4.** Extinction of DKO ISCs is not mediated by Notch signaling downregulation or p53 activation.

- A qRT-PCR analysis of Notch, BMP, and Hedgehog target genes in sorted GFP<sup>+</sup> cells isolated from crypts of CK1 $\epsilon$ <sup>-/-</sup>-Villin<sup>CreER</sup>-Lgr5<sup>CreER</sup> (CK1 $\epsilon$ <sup>-/-</sup>) and DKO-Villin<sup>CreER</sup>-Lgr5<sup>CreER</sup> mice (DKO) 2.5 days after KO induction. Data represent mean of three independent sorting experiments, each with a pool of six mice; t-test was performed, ns = non-significant. Error bars indicate SEM.
- B qRT-PCR analysis of p53 targets in sorted GFP<sup>+</sup> and GFP<sup>-</sup> cells isolated from crypts of CK1 $\epsilon$ <sup>-/-</sup>-Villin<sup>CreER</sup>-Lgr5<sup>CreER</sup> (CK1 $\epsilon$ <sup>-/-</sup>) and DKO-Villin<sup>CreER</sup>-Lgr5<sup>CreER</sup> (DKO), 2.5 days after KO induction. Data represent mean of three independent sorting experiments, each with a pool of six mice; t-test was performed, \**P* < 0.05 \*\**P* < 0.01. Error bars indicate SEM.
- C qRT-PCR analysis of ISC markers in IECs isolated from CK1 $\delta$  hetero (hetero; *n* = 3), DKO (*n* = 3) and TKO (*n* = 3) mice (mean  $\pm$  SEM), 5 days after KO induction; t-test was performed, ns = non-significant.

**Figure EV5.** Decreased levels of Dvl2 in crypt DKO IECs.

- A Survival analysis was done by scoring 100 organoids of CK1 $\epsilon$ <sup>-/-</sup> and DKO organoids treated with ENR or ENR+VC. Data represent mean  $\pm$  SEM of three independent experiments.
- B Western blot analysis of nuclear (N) and cytoplasmic (C) fractions of CK1 $\epsilon$ <sup>-/-</sup> and DKO mouse crypt IECs; p-Dvl2 identified by electrophoretic shift in Dvl mobility. WB quantification shown at the bottom.
- C qRT-PCR analysis of Dvl isoforms in sorted GFP<sup>+</sup> cells isolated from crypts of WT, CK1 $\epsilon$ <sup>-/-</sup>, CK1 $\delta$  KO, and DKO mice 2.5 days after KO induction. Data represent mean of three independent sorting experiments, each with a pool of six mice.
- D qRT-PCR analysis of Fzd isoforms in WT, CK1 $\epsilon$ <sup>-/-</sup>, DKO, CK1 $\epsilon$ <sup>-/-</sup> Dvl-NLS, and DKO Dvl-NLS expressing organoids 4 days after tamoxifen treatment and KO induction (*n* = 3, mean  $\pm$  SEM).
- E Representative bright field images of CK1 $\epsilon$ <sup>-/-</sup> and DKO organoids expressing Dvl-NLS and shFzd7 at day 4 or 5 after KO and Dvl induction. Insets represent organoids counted as live. Scale bar, 400  $\mu$ m.

Source data are available online for this figure.

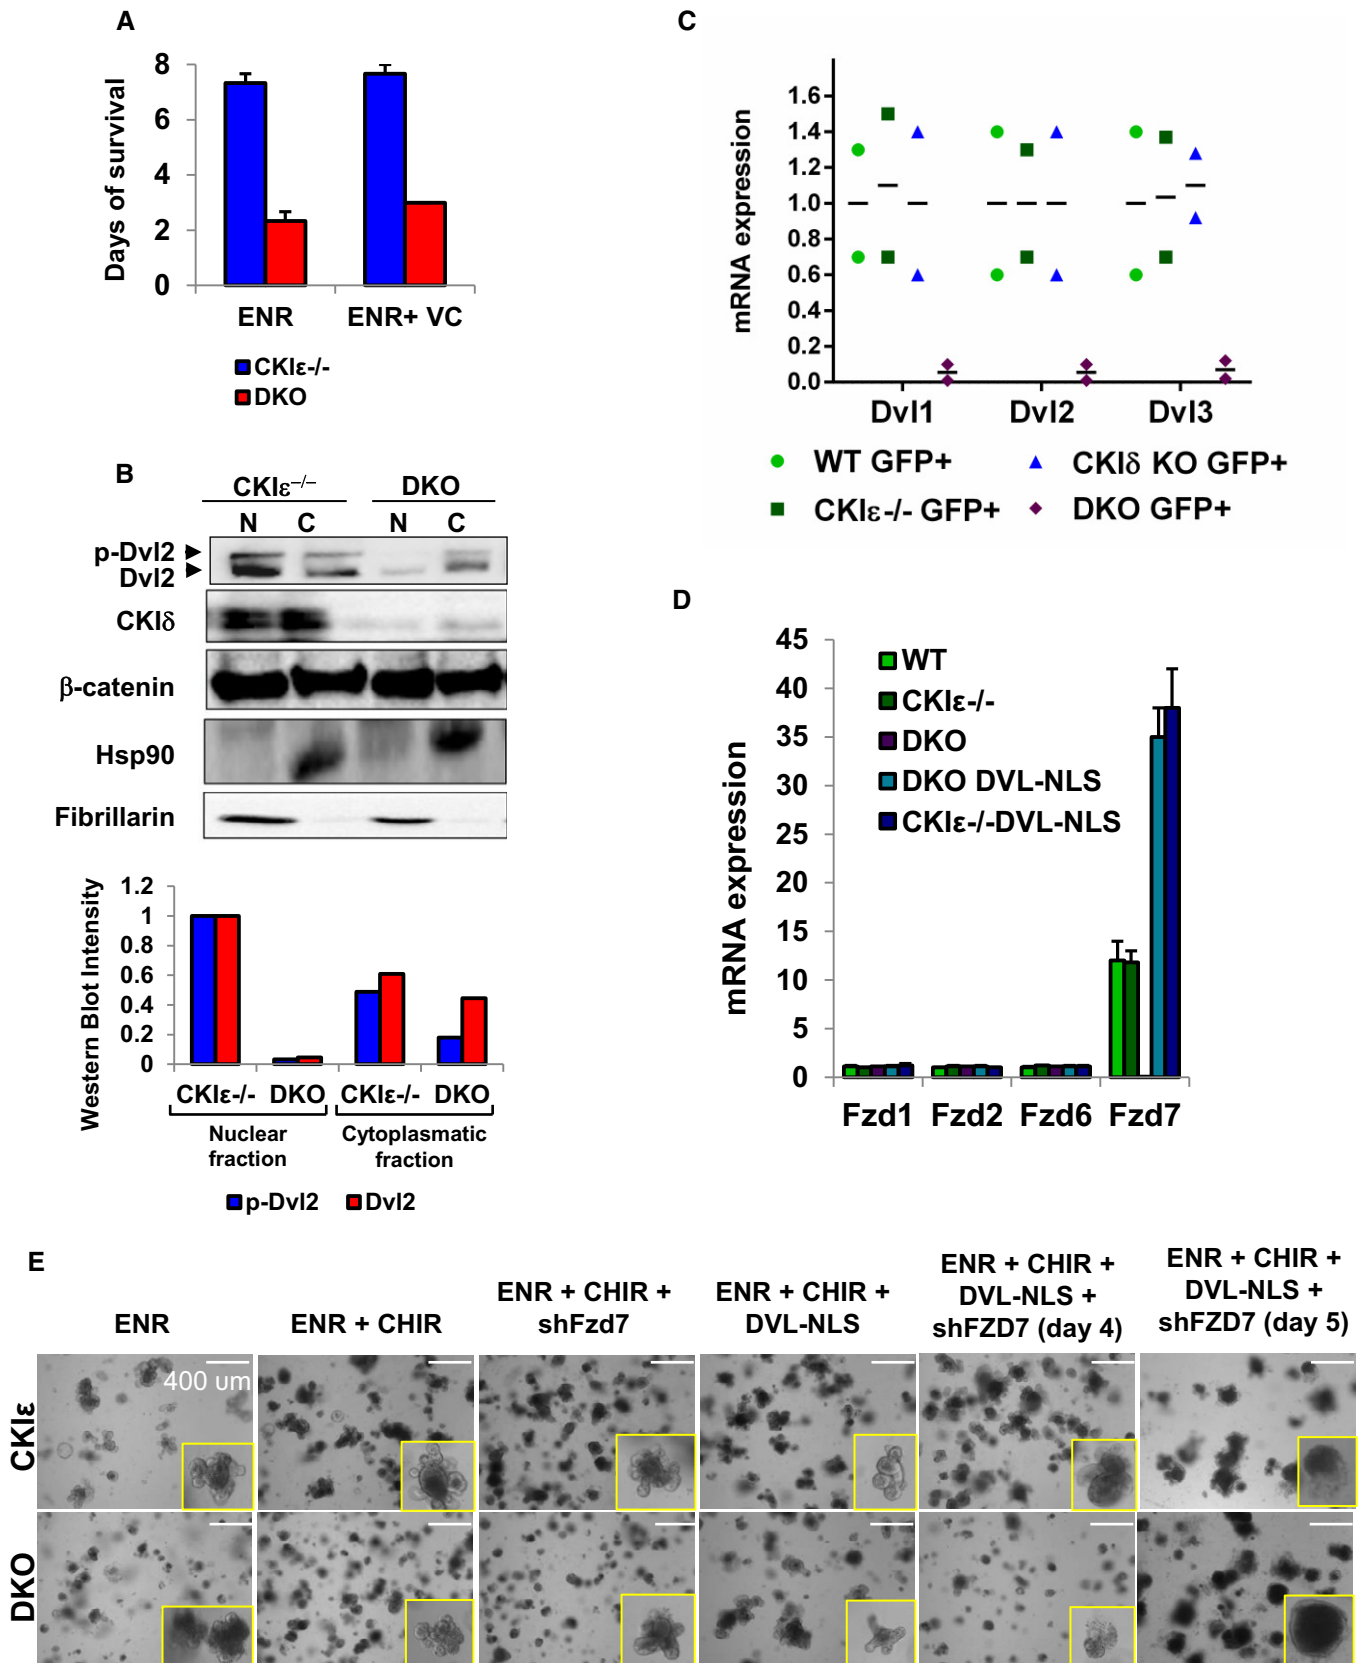

Figure EV5.
